# Supplementary material for: Co-axial electrospray: a versatile tool to fabricate hybrid electron transporting materials for high efficiency and stable perovskite photovoltaics
Source: Royal Society of Chemistry journal article supplement (doi:10.1039/c8na00409a), 2019-01-01
Supplement: c8na00409a1.pdf [file c8na00409a1.pdf]

## **Supporting Information**

**for**

**Co-axial electrospray: A versatile tool to fabricate the hybrid  
electron transporting materials for high efficiency and stable  
perovskite photovoltaics**

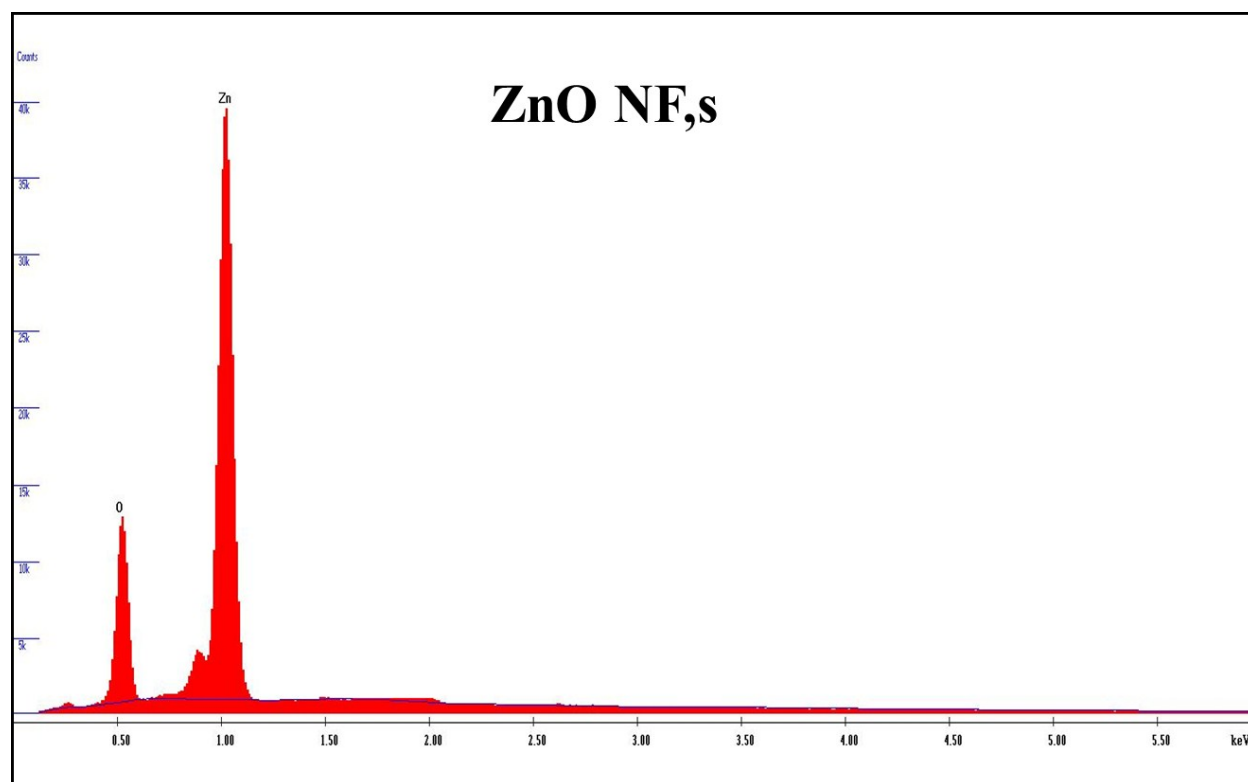

**Figure S1.** Typical EDX spectrum of ZnO NFs as shown in figure 2a.

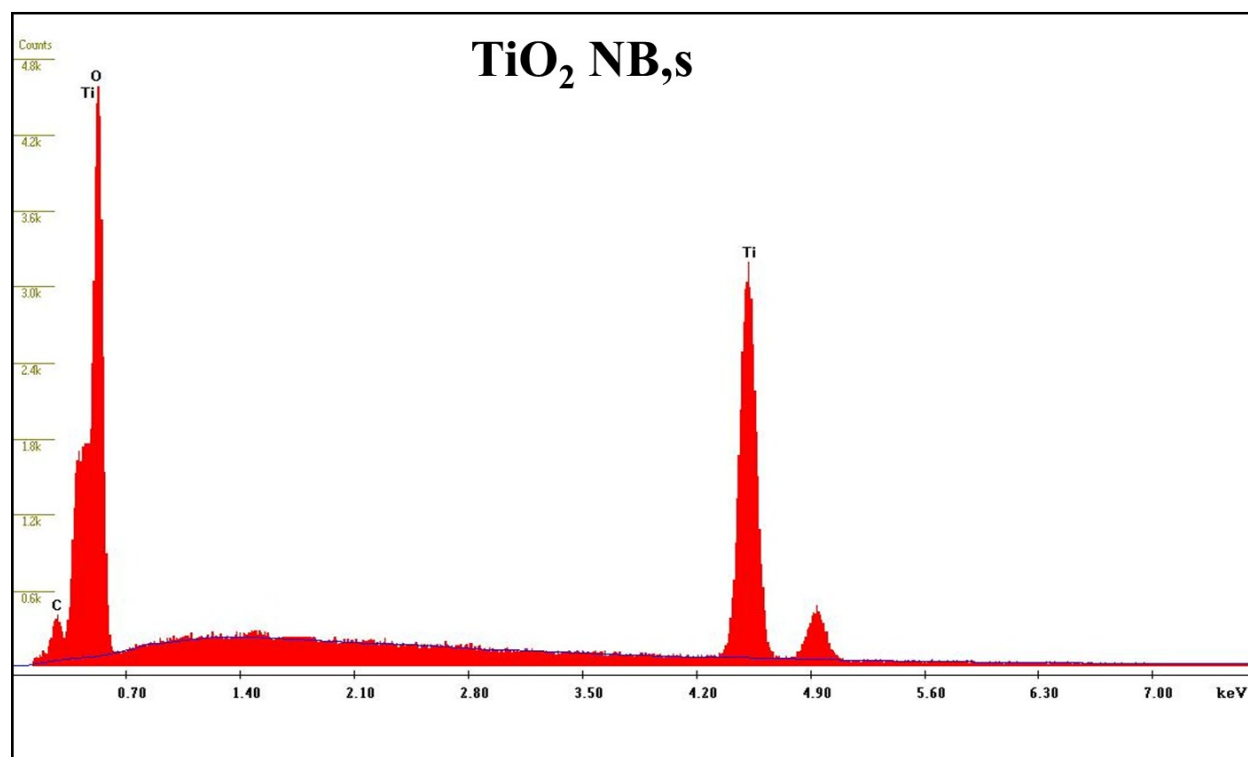

**Figure S2.** Typical EDX spectrum of TiO<sub>2</sub> NB,s as shown in figure 2b.

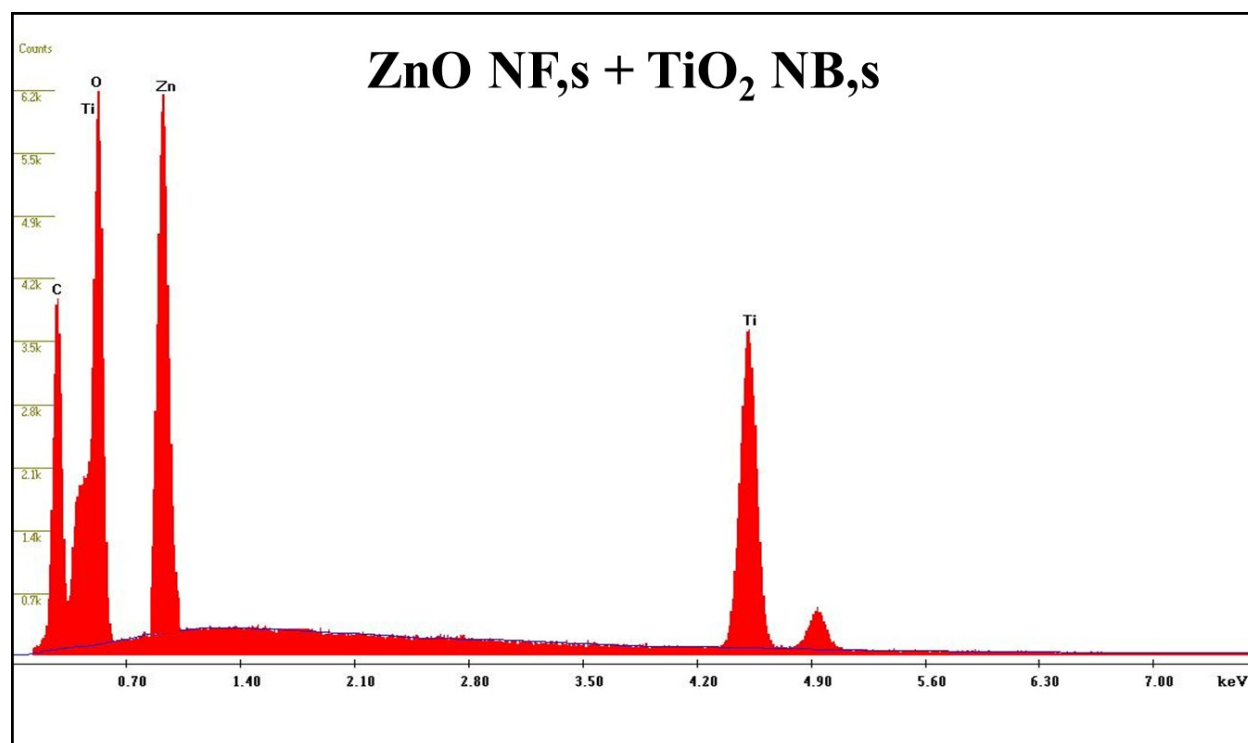

**Figure S3.** Typical EDX spectrum of ZnO NF<sub>s</sub> + TiO<sub>2</sub> NB<sub>s</sub> as shown in figure 2c.

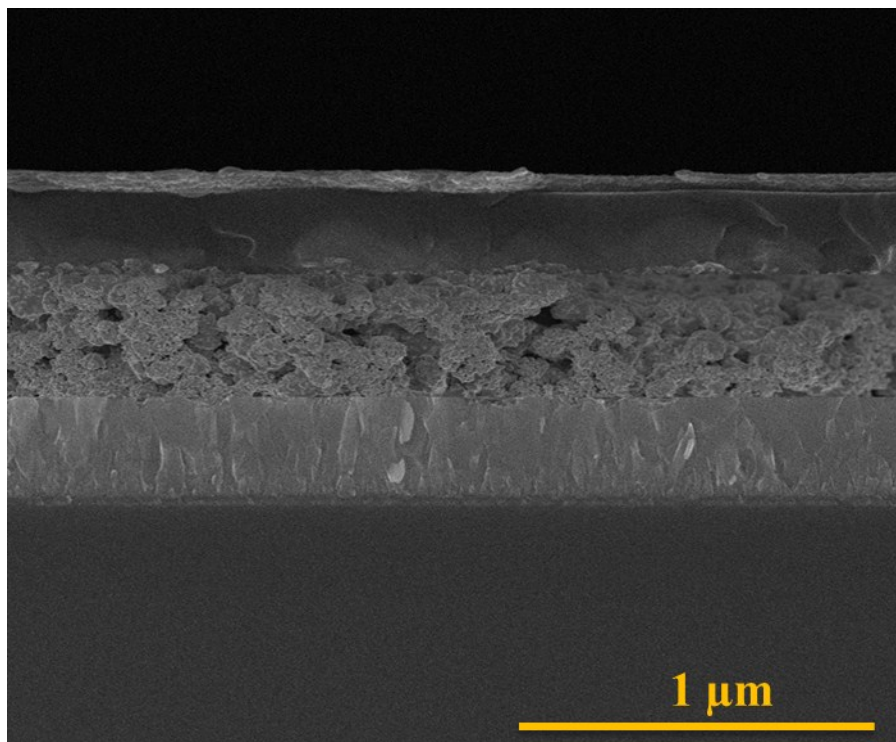

**Figure S4.** Cross-sectional SEM image of complete perovskite solar cell based on hybrid ETM.

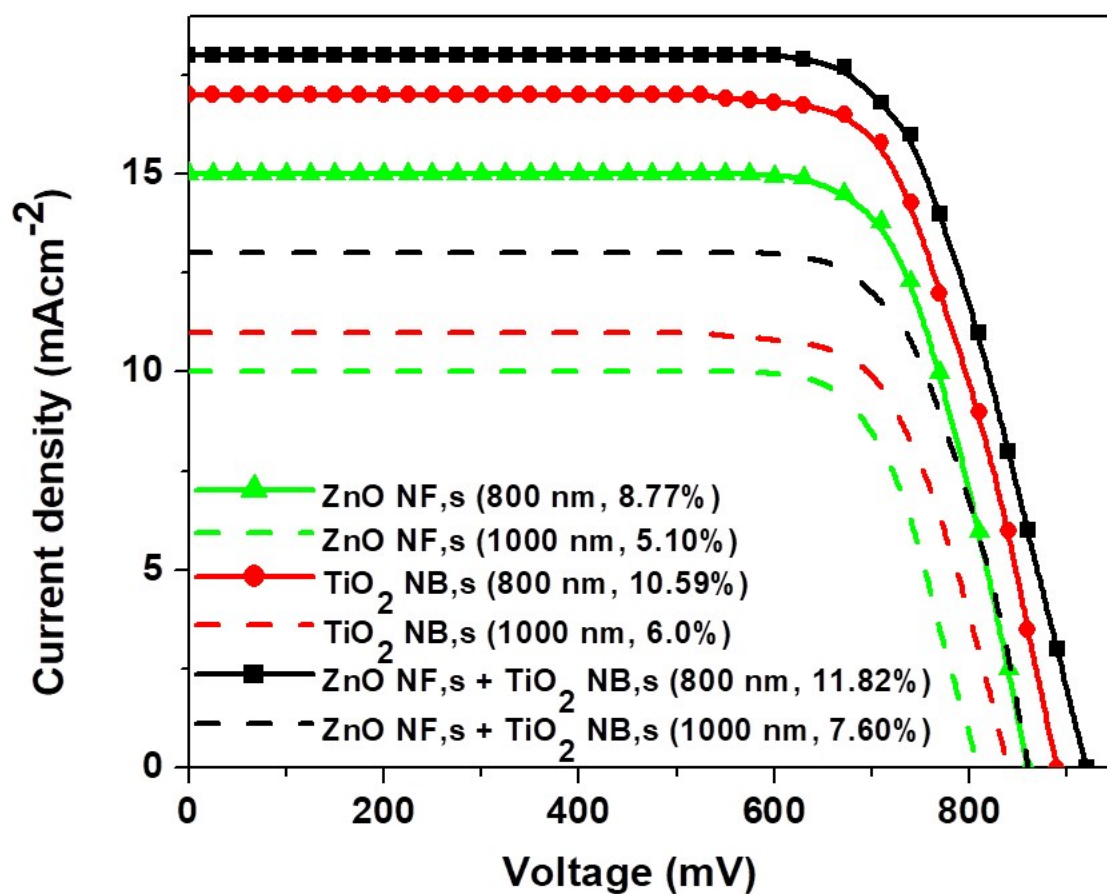

**Figure S5.**  $J$ - $V$  curves for three different ETMs as a function of film thickness.
